# Supplementary material for: Melem- and melamine-derived iminophosphoranes
Source: Royal Society of Chemistry journal article supplement (doi:10.1039/b9nj00621d), 2010-01-01
Supplement: b9nj00621d.pdf [file b9nj00621d.pdf]

***Supplementary Material***

**Melem- and melamine-derived iminophosphanes**

Tatyana Saplinova, Christian Lehnert, Uwe Böhme, Jörg Wagler, Edwin Kroke\*

**Table S1.** Crystal structure determination details for compounds **1 - 6**.

|                                             | <b>1</b>                                                     | <b>2</b>                                                                                      | <b>3</b>                                                                                      | <b>4</b>                                                                | <b>5</b>                                                                       | <b>6</b>                                                                      |
|---------------------------------------------|--------------------------------------------------------------|-----------------------------------------------------------------------------------------------|-----------------------------------------------------------------------------------------------|-------------------------------------------------------------------------|--------------------------------------------------------------------------------|-------------------------------------------------------------------------------|
| formula                                     | C <sub>3</sub> Cl <sub>9</sub> N <sub>6</sub> P <sub>3</sub> | C <sub>45</sub> H <sub>38</sub> Br <sub>2</sub> Cl <sub>2</sub> N <sub>6</sub> P <sub>2</sub> | C <sub>54</sub> H <sub>55</sub> Br <sub>2</sub> Cl <sub>3</sub> N <sub>7</sub> P <sub>2</sub> | C <sub>20</sub> H <sub>19</sub> Br <sub>0.79</sub> Cl <sub>3.21</sub> P | C <sub>12</sub> H <sub>4</sub> Cl <sub>11</sub> N <sub>10</sub> P <sub>3</sub> | C <sub>8</sub> H <sub>5</sub> Cl <sub>12</sub> N <sub>10</sub> P <sub>3</sub> |
| M [g / mol]                                 | 532.05                                                       | 955.47                                                                                        | 1130.16                                                                                       | 467.14                                                                  | 771.11                                                                         | 759.53                                                                        |
| crystal system                              | triclinic                                                    | monoclinic                                                                                    | triclinic                                                                                     | Cubic                                                                   | trigonal                                                                       | monoclinic                                                                    |
| space group                                 | P-1                                                          | P2 <sub>1</sub> /n                                                                            | P-1                                                                                           | Pa-3                                                                    | R3c                                                                            | P2 <sub>1</sub> /n                                                            |
| cell parameters                             |                                                              |                                                                                               |                                                                                               |                                                                         |                                                                                |                                                                               |
| a [Å]                                       | 10.2641(7)                                                   | 13.4575(5)                                                                                    | 14.0193(5)                                                                                    | 16.2023(4)                                                              | 18.0719(3)                                                                     | 14.1973(2)                                                                    |
| b [Å]                                       | 11.7367(8)                                                   | 20.1036(9)                                                                                    | 14.1055(6)                                                                                    | 16.2023(4)                                                              | 18.0719(3)                                                                     | 13.6585(2)                                                                    |
| c [Å]                                       | 15.4861(11)                                                  | 15.6687(6)                                                                                    | 15.1516(6)                                                                                    | 16.2023(4)                                                              | 14.7542(6)                                                                     | 14.7835(3)                                                                    |
| α [°]                                       | 80.333(3)                                                    | 90                                                                                            | 103.179(2)                                                                                    | 90                                                                      | 90                                                                             | 90                                                                            |
| β [°]                                       | 80.019(3)                                                    | 93.930(2)                                                                                     | 96.281(2)                                                                                     | 90                                                                      | 90                                                                             | 111.938(1)                                                                    |
| γ [°]                                       | 76.390(3)                                                    | 90                                                                                            | 112.2370(10)                                                                                  | 90                                                                      | 120                                                                            | 90                                                                            |
| V [Å <sup>3</sup> ]                         | 1769.9(2)                                                    | 4229.1(3)                                                                                     | 2635.91(18)                                                                                   | 4253.34(18)                                                             | 4173.1(2)                                                                      | 2659.14(8)                                                                    |
| Z                                           | 4                                                            | 4                                                                                             | 2                                                                                             | 8                                                                       | 6                                                                              | 4                                                                             |
| ρ <sub>calcd</sub> [mg / m <sup>3</sup> ]   | 1.997                                                        | 1.501                                                                                         | 1.424                                                                                         | 1.459                                                                   | 1.841                                                                          | 1.897                                                                         |
| T [K]                                       | 90(2)                                                        | 90(2)                                                                                         | 100(2)                                                                                        | 150(2)                                                                  | 220(2)                                                                         | 90(2)                                                                         |
| λ [Å]                                       | 0.71073                                                      | 0.71073                                                                                       | 0.71073                                                                                       | 0.71073                                                                 | 0.71073                                                                        | 0.71073                                                                       |
| cryst. size [mm <sup>3</sup> ]              | 0.58 x 0.43 x 0.18                                           | 0.30 x 0.20 x 0.08                                                                            | 0.35 x 0.20 x 0.10                                                                            | 0.65 x 0.43 x 0.34                                                      | 0.35 x 0.20 x 0.15                                                             | 0.20 x 0.16 x 0.08                                                            |
| μ [mm <sup>-1</sup> ]                       | 1.691                                                        | 2.160                                                                                         | 1.794                                                                                         | 2.014                                                                   | 1.298                                                                          | 1.453                                                                         |
| Θ <sub>max</sub> [°]                        | 32.00                                                        | 26.00                                                                                         | 26.00                                                                                         | 26.98                                                                   | 25.97                                                                          | 28.00                                                                         |
| index range                                 | -15 ≤ h ≤ 15<br>-17 ≤ k ≤ 17<br>-23 ≤ l ≤ 22                 | -16 ≤ h ≤ 16<br>-22 ≤ k ≤ 24<br>-19 ≤ l ≤ 16                                                  | -17 ≤ h ≤ 15<br>-17 ≤ k ≤ 17<br>-16 ≤ l ≤ 18                                                  | -17 ≤ h ≤ 20<br>-20 ≤ k ≤ 20<br>-20 ≤ l ≤ 18                            | -22 ≤ h ≤ 20<br>-22 ≤ k ≤ 22<br>-18 ≤ l ≤ 18                                   | -18 ≤ h ≤ 18<br>-18 ≤ k ≤ 17<br>-19 ≤ l ≤ 15                                  |
| param. / restrain.                          | 379 / 0                                                      | 526 / 0                                                                                       | 638 / 21                                                                                      | 121 / 42                                                                | 127 / 18                                                                       | 302 / 0                                                                       |
| reflns collected / unique                   | 48874 / 12204                                                | 35042 / 8318                                                                                  | 29620 / 9842                                                                                  | 23337 / 1557                                                            | 11614 / 1829                                                                   | 28179 / 6389                                                                  |
| R <sub>int</sub>                            | 0.0347                                                       | 0.0507                                                                                        | 0.0371                                                                                        | 0.0580                                                                  | 0.0338                                                                         | 0.0325                                                                        |
| absorpt. corr.                              |                                                              |                                                                                               | Semi-empirical from equivalents                                                               |                                                                         |                                                                                |                                                                               |
| GoF on F <sup>2</sup>                       | 1.055                                                        | 1.048                                                                                         | 1.062                                                                                         | 1.024                                                                   | 1.053                                                                          | 1.044                                                                         |
| R [I > 2σ(I)]                               |                                                              |                                                                                               |                                                                                               |                                                                         |                                                                                |                                                                               |
| R1                                          | 0.0273                                                       | 0.0418                                                                                        | 0.0357                                                                                        | 0.0270                                                                  | 0.0296                                                                         | 0.0299                                                                        |
| wR2                                         | 0.0625                                                       | 0.0992                                                                                        | 0.0770                                                                                        | 0.0544                                                                  | 0.0698                                                                         | 0.0691                                                                        |
| R (all data)                                |                                                              |                                                                                               |                                                                                               |                                                                         |                                                                                |                                                                               |
| R1                                          | 0.0368                                                       | 0.0735                                                                                        | 0.0628                                                                                        | 0.0652                                                                  | 0.0364                                                                         | 0.0401                                                                        |
| wR2                                         | 0.0649                                                       | 0.1074                                                                                        | 0.0825                                                                                        | 0.0637                                                                  | 0.0734                                                                         | 0.0722                                                                        |
| min/max electron density [Å <sup>-3</sup> ] | -0.639 / 0.848                                               | 0.525 / 1.456                                                                                 | 0.488 / -0.661                                                                                | -0.240 / 0.290                                                          | -0.202 / 0.291                                                                 | -0.404 / 0.545                                                                |

**Table S2.** Bond lengths and angles for compound 4.

| Bond lengths, [Å] |            | Bond angles, [°]   |            |
|-------------------|------------|--------------------|------------|
| Cl(1)-P(1)        | 2.0051(13) | C(1)-P(1)-C(1)#1   | 110.59(7)  |
| P(1)-C(1)         | 1.781(2)   | C(1)-P(1)-C(1)#2   | 110.59(7)  |
| P(1)-C(1)#1       | 1.781(2)   | C(1)#1-P(1)-C(1)#2 | 110.59(7)  |
| P(1)-C(1)#2       | 1.781(2)   | C(1)-P(1)-Cl(1)    | 108.32(8)  |
| C(1)-C(6)         | 1.382(3)   | C(1)#1-P(1)-Cl(1)  | 108.32(8)  |
| C(1)-C(2)         | 1.396(3)   | C(1)#2-P(1)-Cl(1)  | 108.32(8)  |
| C(2)-C(3)         | 1.384(3)   | C(6)-C(1)-C(2)     | 120.2(2)   |
| C(3)-C(4)         | 1.384(4)   | C(6)-C(1)-P(1)     | 120.17(19) |
| C(4)-C(5)         | 1.377(4)   | C(2)-C(1)-P(1)     | 119.50(17) |
| C(5)-C(6)         | 1.383(4)   | C(3)-C(2)-C(1)     | 119.7(2)   |
| Cl(2)-C(7)        | 1.72(3)    | C(4)-C(3)-C(2)     | 119.6(2)   |
| C(7)-C(8)         | 1.581(16)  | C(5)-C(4)-C(3)     | 120.7(2)   |
| C(8)-Cl(3)        | 1.72(3)    | C(4)-C(5)-C(6)     | 120.1(2)   |
| Cl(4)-C(9)        | 1.72(3)    | C(1)-C(6)-C(5)     | 119.7(2)   |
| C(9)-C(10)        | 1.581(16)  | C(8)-C(7)-Cl(2)    | 106(3)     |
| C(10)-Cl(5)       | 1.72(3)    | C(7)-C(8)-Cl(3)    | 108(3)     |
|                   |            | C(10)-C(9)-Cl(4)   | 106(3)     |
|                   |            | C(9)-C(10)-Cl(5)   | 112(3)     |

## Quantum chemical analysis

*Cartesian coordinates of optimized molecule geometries.*

Optimization of **2a**.

|   |             |             |             |
|---|-------------|-------------|-------------|
| P | -3.00323000 | -0.09668700 | 0.15516500  |
| P | 3.01413400  | -0.02821400 | 0.12752800  |
| N | -0.01741200 | -0.64595200 | 1.30867700  |
| N | -1.11337900 | -1.71397800 | 3.14421400  |
| H | -2.00989600 | -1.99383000 | 3.52420900  |
| N | 1.14996300  | -1.51021500 | 3.20711100  |
| H | 2.06148600  | -1.64585500 | 3.62820200  |
| N | -2.39343400 | -0.83336400 | 1.50747600  |
| N | 0.05418900  | -2.56893000 | 4.97482900  |
| H | -0.79463800 | -2.89249100 | 5.41692800  |
| H | 0.92217800  | -2.75156800 | 5.45855100  |
| N | 2.36296000  | -0.58808000 | 1.54324000  |
| C | -1.16714300 | -1.01079200 | 1.89194500  |
| C | 0.03137600  | -1.94445900 | 3.79867400  |
| C | 1.15822400  | -0.87322400 | 1.91688700  |
| C | -2.24241800 | -0.60693100 | -1.40916100 |
| C | -1.45030000 | 0.27120600  | -2.16433500 |
| H | -1.25448200 | 1.27794600  | -1.81246100 |
| C | -0.92191500 | -0.15124000 | -3.38432900 |
| H | -0.32456900 | 0.53551500  | -3.97434400 |
| C | -1.16836700 | -1.44421800 | -3.84907000 |
| H | -0.76849600 | -1.76085800 | -4.80734700 |
| C | -1.93771700 | -2.32933400 | -3.08812100 |
| H | -2.13588300 | -3.33292500 | -3.45086000 |
| C | -2.47636500 | -1.91545400 | -1.87181700 |
| H | -3.09676000 | -2.59921800 | -1.30064900 |
| C | -2.92443600 | 1.70787200  | 0.34726300  |
| C | -2.34106000 | 2.28477800  | 1.48343500  |
| H | -1.88161400 | 1.65956100  | 2.24023300  |
| C | -2.37410500 | 3.66887700  | 1.65693400  |
| H | -1.93579700 | 4.11099600  | 2.54617000  |
| C | -2.98524700 | 4.48053500  | 0.70004700  |
| H | -3.01964300 | 5.55601800  | 0.84274500  |
| C | -3.56900000 | 3.90921200  | -0.43389100 |
| H | -4.05424400 | 4.53772500  | -1.17347200 |
| C | -3.54772200 | 2.52773300  | -0.60981000 |
| H | -4.02534600 | 2.09542300  | -1.48361100 |
| C | -4.74143800 | -0.60012300 | 0.11435700  |
| C | -5.41618900 | -0.85911800 | 1.31841700  |
| H | -4.87537800 | -0.83824300 | 2.25760200  |
| C | -6.77796200 | -1.15226300 | 1.30165300  |
| H | -7.29601700 | -1.35741800 | 2.23286300  |
| C | -7.47484500 | -1.18158200 | 0.09157500  |
| H | -8.53573300 | -1.41028500 | 0.08288300  |
| C | -6.80927700 | -0.91869900 | -1.10696600 |

|   |             |             |             |
|---|-------------|-------------|-------------|
| H | -7.34897900 | -0.94511900 | -2.04790600 |
| C | -5.44611700 | -0.62640600 | -1.10130200 |
| H | -4.93914800 | -0.43627900 | -2.04151900 |
| C | 3.13222300  | -1.39945300 | -1.04976400 |
| C | 4.38465900  | -1.86742100 | -1.47727900 |
| H | 5.29670800  | -1.40127700 | -1.12149400 |
| C | 4.45607600  | -2.94037800 | -2.36635800 |
| H | 5.42478700  | -3.29932900 | -2.69806900 |
| C | 3.28713400  | -3.54844000 | -2.82414300 |
| H | 3.34696300  | -4.38452800 | -3.51379600 |
| C | 2.03894600  | -3.08357100 | -2.39857100 |
| H | 1.13033200  | -3.55515700 | -2.75803800 |
| C | 1.95357900  | -2.01069800 | -1.51553000 |
| H | 0.98124500  | -1.64998100 | -1.19465200 |
| C | 2.13597600  | 1.35838700  | -0.64016700 |
| C | 1.49673000  | 2.31384000  | 0.16506800  |
| H | 1.44502400  | 2.17884800  | 1.24068100  |
| C | 0.93048300  | 3.44529700  | -0.41846200 |
| H | 0.43120400  | 4.17988700  | 0.20407600  |
| C | 1.01187600  | 3.63711800  | -1.80057100 |
| H | 0.58455700  | 4.52833100  | -2.24939800 |
| C | 1.65128100  | 2.69094900  | -2.60424100 |
| H | 1.72425800  | 2.84520200  | -3.67624200 |
| C | 2.20847000  | 1.54757800  | -2.02983900 |
| H | 2.70074600  | 0.81364300  | -2.65949100 |
| C | 4.66987900  | 0.53047400  | 0.59173100  |
| C | 5.26185100  | 1.62260500  | -0.06310800 |
| H | 4.71654600  | 2.17554100  | -0.82018200 |
| C | 6.55947100  | 2.00983200  | 0.26972800  |
| H | 7.01267000  | 2.85734100  | -0.23381600 |
| C | 7.26901300  | 1.31421900  | 1.24976100  |
| H | 8.27819500  | 1.61978500  | 1.50693200  |
| C | 6.68253000  | 0.22715300  | 1.90333800  |
| H | 7.23502800  | -0.31133300 | 2.66653100  |
| C | 5.38699100  | -0.16756600 | 1.57901100  |
| H | 4.93005800  | -1.00670900 | 2.09158500  |

**2b.**

|   |             |            |             |
|---|-------------|------------|-------------|
| P | 2.83871200  | 0.20355000 | -0.15112100 |
| P | -2.88294600 | 0.25655700 | -0.05317300 |
| N | -0.00508300 | 1.48880900 | -0.58007500 |
| N | 1.17612000  | 3.37236900 | -1.47046100 |
| N | -1.18954300 | 3.50459000 | -1.10060500 |
| N | 2.34693800  | 1.50130600 | -0.91313700 |
| N | -0.00450600 | 5.29501400 | -1.93398600 |
| H | 0.80536000  | 5.57950900 | -2.46230600 |
| H | -0.90065400 | 5.67433400 | -2.19652300 |
| N | -2.34694500 | 1.72978500 | -0.26597000 |

|   |             |             |             |
|---|-------------|-------------|-------------|
| C | 1.13039200  | 2.11679600  | -0.98093600 |
| C | -0.00805000 | 3.99806900  | -1.49211200 |
| C | -1.14318900 | 2.23082600  | -0.66245100 |
| C | 2.23009100  | -1.45481800 | -0.66199400 |
| C | 1.23479400  | -2.14082300 | 0.04833200  |
| H | 0.81722600  | -1.71431000 | 0.95331600  |
| C | 0.77354400  | -3.37707400 | -0.40664600 |
| H | 0.00711500  | -3.89897200 | 0.15691600  |
| C | 1.28550600  | -3.93134100 | -1.57987400 |
| H | 0.92400700  | -4.89385200 | -1.93017700 |
| C | 2.25960700  | -3.24319300 | -2.30656700 |
| H | 2.65903700  | -3.66716400 | -3.22331100 |
| C | 2.72971900  | -2.01246200 | -1.85093000 |
| H | 3.49431600  | -1.48803200 | -2.41532700 |
| C | 2.67433600  | 0.28988700  | 1.68050200  |
| C | 2.33314000  | 1.52919800  | 2.23967800  |
| H | 2.11387000  | 2.36745700  | 1.58741500  |
| C | 2.28796300  | 1.68765400  | 3.62540300  |
| H | 2.02355000  | 2.65270400  | 4.04738600  |
| C | 2.58920900  | 0.61367900  | 4.46446500  |
| H | 2.56292500  | 0.74082100  | 5.54302900  |
| C | 2.93011300  | -0.62413800 | 3.91464100  |
| H | 3.16550100  | -1.46320600 | 4.56300700  |
| C | 2.97206100  | -0.78638800 | 2.53014900  |
| H | 3.23052700  | -1.75636200 | 2.11726400  |
| C | 4.64111900  | 0.14601600  | -0.48138000 |
| C | 5.24052700  | 1.24293200  | -1.11334400 |
| H | 4.60802600  | 2.07117700  | -1.41575900 |
| C | 6.61654400  | 1.24679400  | -1.34704300 |
| H | 7.07494600  | 2.09863100  | -1.84087800 |
| C | 7.40059300  | 0.16301900  | -0.94996800 |
| H | 8.47145200  | 0.16908100  | -1.13243800 |
| C | 6.80678800  | -0.93275600 | -0.31932600 |
| H | 7.41249800  | -1.78055200 | -0.01280100 |
| C | 5.43246800  | -0.94243000 | -0.08595500 |
| H | 4.98015400  | -1.80614100 | 0.39188500  |
| C | -2.84609100 | -0.83295900 | -1.53022800 |
| C | -4.00858700 | -1.39356600 | -2.07993500 |
| H | -4.97224300 | -1.21798800 | -1.61407400 |
| C | -3.93346400 | -2.17422600 | -3.23472400 |
| H | -4.83902100 | -2.60394200 | -3.65325200 |
| C | -2.70202200 | -2.39372400 | -3.85231000 |
| H | -2.64642600 | -2.99806500 | -4.75340900 |
| C | -1.54266600 | -1.82989800 | -3.31518000 |
| H | -0.58188000 | -1.99455500 | -3.79303300 |
| C | -1.60850200 | -1.05280100 | -2.15979700 |
| H | -0.71132500 | -0.59826500 | -1.75123700 |
| C | -2.14661700 | -0.73521000 | 1.30855600  |
| C | -1.46187300 | -0.05527100 | 2.32403600  |
| H | -1.32444600 | 1.01806600  | 2.24519000  |
| C | -0.94418900 | -0.75745500 | 3.41267700  |

|   |             |             |             |
|---|-------------|-------------|-------------|
| H | -0.39928000 | -0.22556400 | 4.18574800  |
| C | -1.11154600 | -2.14129900 | 3.49770700  |
| H | -0.71073300 | -2.68598600 | 4.34773900  |
| C | -1.78722500 | -2.82643800 | 2.48546700  |
| H | -1.91408500 | -3.90376700 | 2.54658800  |
| C | -2.29548100 | -2.12766200 | 1.38886900  |
| H | -2.79760600 | -2.66802800 | 0.59150600  |
| C | -4.64172500 | 0.47578000  | 0.41083900  |
| C | -5.38958800 | -0.52905400 | 1.04173700  |
| H | -4.92815200 | -1.47594200 | 1.30340200  |
| C | -6.73116100 | -0.31223700 | 1.35730800  |
| H | -7.30226200 | -1.09429900 | 1.84909600  |
| C | -7.33299400 | 0.90984500  | 1.05188900  |
| H | -8.37648100 | 1.07855500  | 1.30237100  |
| C | -6.58927400 | 1.91668300  | 0.43424700  |
| H | -7.05141600 | 2.87237700  | 0.20483700  |
| C | -5.24837400 | 1.70456500  | 0.11383100  |
| H | -4.64522600 | 2.48045000  | -0.34591100 |

cation of **3a**

|   |             |             |             |
|---|-------------|-------------|-------------|
| P | 3.82523300  | 0.33357300  | -0.01641900 |
| P | -3.82524900 | 0.33355100  | -0.01634600 |
| N | 0.00000400  | 0.74315100  | -0.10748700 |
| H | -0.00000300 | 1.75156800  | -0.18310500 |
| N | 1.20976100  | -1.25153600 | 0.06013400  |
| N | -1.20969500 | -1.25154800 | 0.06031500  |
| N | -2.28101100 | 0.86462800  | -0.10862000 |
| N | 2.28102400  | 0.86464900  | -0.10893600 |
| H | -0.87082200 | -3.68753200 | 0.06070400  |
| H | 0.87089300  | -3.68754500 | 0.06058700  |
| N | 0.00004100  | -3.19428100 | 0.17176300  |
| C | 1.21311600  | 0.08447900  | -0.04289000 |
| C | 0.00003700  | -1.84770200 | 0.08838200  |
| C | -1.21309500 | 0.08446600  | -0.04272800 |
| C | -4.82685300 | 1.80445500  | -0.37761700 |
| C | -4.26833900 | 3.08329300  | -0.24053800 |
| H | -3.22839800 | 3.18124600  | 0.04827400  |
| C | -5.04834500 | 4.21159900  | -0.49334600 |
| H | -4.61274700 | 5.20051300  | -0.39019400 |
| C | -6.38184600 | 4.07080600  | -0.88063300 |
| H | -6.98530300 | 4.95135400  | -1.07843600 |
| C | -6.94001500 | 2.79821500  | -1.02099100 |
| H | -7.97438600 | 2.68704100  | -1.33031700 |
| C | -6.16680700 | 1.66571000  | -0.77301000 |
| H | -6.60405200 | 0.68001500  | -0.89885300 |
| C | -4.31103500 | -0.28690800 | 1.62787300  |
| C | -5.15982400 | 0.46975800  | 2.45094100  |
| H | -5.56034000 | 1.41514900  | 2.10263900  |
| C | -5.49576600 | 0.00570100  | 3.72291000  |

|   |             |             |             |
|---|-------------|-------------|-------------|
| H | -6.15429000 | 0.59533000  | 4.35276500  |
| C | -4.98956600 | -1.21052900 | 4.18101100  |
| H | -5.25475600 | -1.57050400 | 5.17036300  |
| C | -4.14006300 | -1.96507900 | 3.36810400  |
| H | -3.74275700 | -2.90993000 | 3.72592500  |
| C | -3.79699500 | -1.50959100 | 2.09717400  |
| H | -3.12234900 | -2.08282400 | 1.47178700  |
| C | -4.25442400 | -0.92766600 | -1.25982600 |
| C | -5.20129900 | -1.93006500 | -1.00537400 |
| H | -5.66183000 | -2.01415800 | -0.02673200 |
| C | -5.54838500 | -2.83228400 | -2.01261400 |
| H | -6.28162600 | -3.60686700 | -1.81075700 |
| C | -4.95443400 | -2.73956000 | -3.27141200 |
| H | -5.22670200 | -3.44245500 | -4.05272300 |
| C | -4.01055100 | -1.74175400 | -3.52823300 |
| H | -3.54837900 | -1.66827000 | -4.50771000 |
| C | -3.66130100 | -0.83671300 | -2.52906900 |
| H | -2.92772400 | -0.06245700 | -2.73120200 |
| C | 4.82691500  | 1.80460300  | -0.37698600 |
| C | 4.26820900  | 3.08337900  | -0.24018500 |
| H | 3.22809200  | 3.18122600  | 0.04802600  |
| C | 5.04826600  | 4.21176800  | -0.49248900 |
| H | 4.61251800  | 5.20063800  | -0.38954300 |
| C | 6.38200100  | 4.07111100  | -0.87900300 |
| H | 6.98550000  | 4.95171600  | -1.07641800 |
| C | 6.94036300  | 2.79857000  | -1.01909300 |
| H | 7.97492400  | 2.68750700  | -1.32782100 |
| C | 6.16711200  | 1.66599100  | -0.77161400 |
| H | 6.60452000  | 0.68034100  | -0.89725500 |
| C | 4.25466200  | -0.92728100 | -1.26019000 |
| C | 3.66125800  | -0.83636800 | -2.52930300 |
| H | 2.92729000  | -0.06240900 | -2.73114500 |
| C | 4.01073500  | -1.74106700 | -3.52870000 |
| H | 3.54833400  | -1.66762100 | -4.50807100 |
| C | 4.95512400  | -2.73848600 | -3.27224600 |
| H | 5.22756100  | -3.44111600 | -4.05373600 |
| C | 5.54936300  | -2.83116800 | -2.01358100 |
| H | 6.28299300  | -3.60545500 | -1.81200400 |
| C | 5.20205500  | -1.92929000 | -1.00611400 |
| H | 5.66280800  | -2.01335900 | -0.02757200 |
| C | 4.31070000  | -0.28739300 | 1.62770100  |
| C | 5.15836400  | 0.46961600  | 2.45162400  |
| H | 5.55822100  | 1.41554600  | 2.10402800  |
| C | 5.49404500  | 0.00520200  | 3.72352900  |
| H | 6.15169900  | 0.59509700  | 4.35404400  |
| C | 4.98871000  | -1.21173100 | 4.18071900  |
| H | 5.25371300  | -1.57199400 | 5.17001600  |
| C | 4.14031200  | -1.96661900 | 3.36697300  |
| H | 3.74368100  | -2.91202000 | 3.72408700  |
| C | 3.79750200  | -1.51076900 | 2.09610300  |
| H | 3.12367500  | -2.08426000 | 1.47008100  |





cation of **6a**.

|    |             |             |             |
|----|-------------|-------------|-------------|
| Cl | -1.39545100 | 6.10089500  | -0.00170200 |
| Cl | -2.92148700 | 3.78502200  | -1.61063200 |
| Cl | -2.92014500 | 3.78739400  | 1.61207700  |
| Cl | 5.86035600  | 0.31015600  | 1.61225300  |
| Cl | 5.86047200  | 0.31109400  | -1.61159200 |
| Cl | 7.12622800  | -2.15702200 | -0.00035000 |
| Cl | -4.83688300 | -4.86706400 | -0.00135300 |
| Cl | -4.79368900 | -2.08624400 | -1.60941100 |
| Cl | -4.79389000 | -2.08856700 | 1.61073900  |
| P  | -1.72931400 | 4.12424500  | -0.00003500 |
| P  | 5.57841000  | -0.88345900 | -0.00004200 |
| P  | -4.02843800 | -3.03731500 | 0.00000500  |
| N  | 1.22965600  | 1.75315600  | 0.00026400  |
| N  | 2.78173200  | 0.02910200  | 0.00009100  |
| N  | 2.03385900  | -2.26050400 | -0.00031000 |
| N  | -0.24462500 | -2.68899000 | -0.00028100 |
| H  | -0.04096900 | -3.68298800 | -0.00036700 |
| N  | -1.86172200 | -0.96761900 | 0.00019700  |
| N  | -1.12801600 | 1.23026300  | 0.00020300  |
| N  | 0.47293100  | -0.48639800 | -0.00004500 |
| N  | -0.32088200 | 3.42553200  | 0.00021800  |
| N  | 4.27045400  | -1.77162900 | -0.00032600 |
| N  | -2.45861300 | -3.24499900 | 0.00011600  |
| C  | -0.06809200 | 2.10181600  | 0.00019700  |
| C  | 1.52377900  | 0.46680400  | 0.00010400  |
| C  | 3.01467500  | -1.29283100 | -0.00016900 |
| C  | 0.81597600  | -1.82608700 | -0.00021600 |
| C  | -1.55678400 | -2.25168300 | 0.00000000  |
| C  | -0.87055200 | -0.05148300 | 0.00009200  |

**5a.**

|    |             |             |             |
|----|-------------|-------------|-------------|
| Cl | -0.89282600 | -6.78973900 | 0.00000000  |
| Cl | -2.71922900 | -4.70913000 | 1.60805200  |
| Cl | -2.71922900 | -4.70913000 | -1.60805200 |
| Cl | 5.43411100  | -0.00601900 | -1.60805800 |
| Cl | 5.43411100  | -0.00601900 | 1.60805800  |
| Cl | 6.33267900  | 2.61244800  | 0.00000000  |
| Cl | -5.43436500 | 4.17131100  | 0.00000000  |
| Cl | -2.71922900 | 4.71300000  | -1.60777500 |
| Cl | -2.71922900 | 4.71300000  | 1.60777500  |
| P  | -1.46200800 | -4.84944700 | 0.00000000  |
| P  | 4.93139100  | 1.15487800  | 0.00000000  |
| P  | -3.46954600 | 3.69400800  | 0.00000000  |
| N  | 1.11074900  | -2.09067300 | 0.00000000  |
| N  | 2.35425700  | -0.13396300 | 0.00000000  |
| N  | 1.25759000  | 2.00959000  | 0.00000000  |
| N  | -1.05881900 | 2.10821200  | 0.00000000  |

|   |             |             |            |
|---|-------------|-------------|------------|
| N | -2.36675800 | 0.08647800  | 0.00000000 |
| N | -1.29403800 | -1.96889600 | 0.00000000 |
| N | 0.00045400  | 0.00174900  | 0.00000000 |
| N | -0.15204800 | -4.00178400 | 0.00000000 |
| N | 3.54445500  | 1.87066300  | 0.00000000 |
| N | -3.39024900 | 2.13568500  | 0.00000000 |
| C | -0.11681800 | -2.62867800 | 0.00000000 |
| C | 1.18152400  | -0.76383600 | 0.00000000 |
| C | 2.33716200  | 1.21543500  | 0.00000000 |
| C | 0.07306300  | 1.40746400  | 0.00000000 |
| C | -2.21880700 | 1.41854400  | 0.00000000 |
| C | -1.25315800 | -0.63830400 | 0.00000000 |

**Table S3.** Comparison between geometries from X-ray structure analyses and optimized geometries.

| molecule |    | 2               | 2a                 |                             |                     |
|----------|----|-----------------|--------------------|-----------------------------|---------------------|
| bond     |    | X-ray structure | optimized geometry | difference                  | absolute difference |
| P1       | N4 | 1.622           | 1.656              | 0.034                       | 0.034               |
| P2       | N6 | 1.609           | 1.656              | 0.047                       | 0.047               |
| N1       | C1 | 1.345           | 1.343              | -0.002                      | 0.002               |
| N1       | C3 | 1.345           | 1.340              | -0.005                      | 0.005               |
| N2       | C2 | 1.336           | 1.338              | 0.002                       | 0.002               |
| N2       | C1 | 1.386           | 1.439              | 0.053                       | 0.053               |
| N3       | C2 | 1.346           | 1.339              | -0.007                      | 0.007               |
| N3       | C3 | 1.388           | 1.437              | 0.049                       | 0.049               |
| N4       | C1 | 1.309           | 1.293              | -0.016                      | 0.016               |
| N5       | C2 | 1.311           | 1.332              | 0.021                       | 0.021               |
| N6       | C3 | 1.307           | 1.297              | -0.01                       | 0.010               |
|          |    |                 |                    | <b>Statistical analyses</b> |                     |
|          |    |                 |                    | Average                     | 0.022               |
|          |    |                 |                    | Stand.Dev.                  | 0.020               |
|          |    |                 |                    | Hits                        | 11                  |
|          |    |                 |                    | Lower quartile              | 0.006               |
|          |    |                 |                    | Median                      | 0.016               |
|          |    |                 |                    | Upper quartile              | 0.040               |
|          |    |                 |                    | Minimum                     | 0.002               |
|          |    |                 |                    | Maximum                     | 0.053               |
|          |    |                 |                    | Range                       | 0.051               |

Bond lengths to hydrogen atoms are too short from X-ray data. Therefore large deviations are observed. (J. P. Glusker, M. Lewis, M. Rossi, *Crystal Structure Analysis for Chemists and Biologists*, VCH publishers 1994, New York.) Thus the N-H bonds are not considered for statistical analysis but are only listed in the following table.

| molecule |      | 2               | 2a                 |            |
|----------|------|-----------------|--------------------|------------|
| bond     |      | X-ray structure | optimized geometry | difference |
| N2       | H2N  | 0.72            | 1.013              | 0.293      |
| N3       | H3N  | 0.73            | 1.013              | 0.283      |
| N5       | H5NA | 0.83            | 1.010              | 0.18       |
| N5       | H5NB | 0.9             | 1.010              | 0.11       |

| molecule                    |     | 6               | 6a                 |            |                     |
|-----------------------------|-----|-----------------|--------------------|------------|---------------------|
| bond                        |     | X-ray structure | optimized geometry | difference | absolute difference |
| P1                          | N8  | 1.567           | 1.572              | 0.005      | 0.005               |
| P2                          | N9  | 1.5565          | 1.581              | 0.025      | 0.025               |
| P3                          | N10 | 1.5602          | 1.583              | 0.023      | 0.023               |
| N1                          | C2  | 1.323           | 1.320              | -0.003     | 0.003               |
| N1                          | C1  | 1.346           | 1.344              | -0.002     | 0.002               |
| N2                          | C2  | 1.333           | 1.332              | -0.001     | 0.001               |
| N2                          | C3  | 1.339           | 1.342              | 0.003      | 0.003               |
| N3                          | C4  | 1.307           | 1.293              | -0.014     | 0.014               |
| N3                          | C3  | 1.367           | 1.378              | 0.011      | 0.011               |
| N4                          | C4  | 1.354           | 1.367              | 0.013      | 0.013               |
| N4                          | C5  | 1.363           | 1.383              | 0.020      | 0.020               |
| N5                          | C5  | 1.326           | 1.320              | -0.006     | 0.006               |
| N5                          | C6  | 1.342           | 1.350              | 0.008      | 0.008               |
| N6                          | C6  | 1.309           | 1.307              | -0.002     | 0.002               |
| N6                          | C1  | 1.36            | 1.372              | 0.012      | 0.012               |
| N7                          | C4  | 1.38            | 1.383              | 0.003      | 0.003               |
| N7                          | C6  | 1.396           | 1.412              | 0.016      | 0.016               |
| N7                          | C2  | 1.4             | 1.419              | 0.019      | 0.019               |
| N8                          | C1  | 1.357           | 1.348              | -0.009     | 0.009               |
| N9                          | C3  | 1.359           | 1.344              | -0.015     | 0.015               |
| N10                         | C5  | 1.345           | 1.342              | -0.003     | 0.003               |
| <b>Statistical analyses</b> |     |                 |                    |            |                     |
| Average                     |     |                 |                    |            | 0.010               |
| Stand.Dev.                  |     |                 |                    |            | 0.007               |
| Hits                        |     |                 |                    |            | 21                  |
| Lower quartile              |     |                 |                    |            | 0.003               |
| Median                      |     |                 |                    |            | 0.009               |
| Upper quartile              |     |                 |                    |            | 0.015               |
| Minimum                     |     |                 |                    |            | 0.001               |
| Maximum                     |     |                 |                    |            | 0.025               |
| Range                       |     |                 |                    |            | 0.024               |

Bond lengths to hydrogen atoms are too short from X-ray data. Therefore large deviations are observed. (J. P. Glusker, M. Lewis, M. Rossi, *Crystal Structure Analysis for Chemists and Biologists*, VCH publishers 1994, New York.) Thus the N-H bond is not considered for statistical analysis but is only listed here.

| molecule |     | 6               | 6a                 |            |
|----------|-----|-----------------|--------------------|------------|
| bond     |     | X-ray structure | optimized geometry | difference |
| N4       | H4N | 0.94            | 1.015              | 0.075      |



**Table S4:** Natural charges at the B3LYP/6-31G(d,p) level.

| <b>atom</b> | <b>2a</b> | <b>2b</b> | <b>3a</b> | <b>difference<br/>2a-2b</b> | <b>difference<br/>3a-2b</b> |
|-------------|-----------|-----------|-----------|-----------------------------|-----------------------------|
| N1          | -0.61     | -0.66     | -0.61     | 0.05                        | 0.05                        |
| C3          | 0.66      | 0.63      | 0.67      | 0.03                        | 0.04                        |
| N3          | -0.62     | -0.60     | -0.64     | -0.02                       | -0.04                       |
| C2          | 0.71      | 0.61      | 0.64      | 0.10                        | 0.03                        |
| N5          | -0.80     | -0.84     | -0.81     | 0.04                        | 0.03                        |
| N6          | -0.94     | -1.05     | -1.00     | 0.11                        | 0.05                        |
| P2          | 1.92      | 1.91      | 1.91      | 0.01                        | 0.00                        |

  

| <b>atom</b>  | <b>6a</b> | <b>5a</b> | <b>difference<br/>6a-5a</b> |
|--------------|-----------|-----------|-----------------------------|
| N7           | -0.47     | -0.47     | 0.00                        |
| C4           | 0.67      | 0.65      | 0.02                        |
| N4           | -0.60     | -0.52     | -0.08                       |
| C5           | 0.66      | 0.62      | 0.04                        |
| N5           | -0.56     | -0.58     | 0.02                        |
| C6           | 0.66      | 0.65      | 0.01                        |
| N10          | -1.00     | -0.98     | -0.02                       |
| P3           | 1.53      | 1.54      | 0.01                        |
| Cl7          | -0.12     | -0.18     | 0.06                        |
| Cl8          | -0.15     | -0.20     | 0.05                        |
| Cl9          | -0.15     | -0.20     | 0.05                        |
| Cl (average) | -0.14     | -0.19     | 0.05                        |
